# Supplementary material for: Deubiquitinating Enzyme Inhibitors Block Chikungunya Virus Replication
Source: MDPI journal article supplement (doi:10.3390/v15020481), 2023-02-09
Supplement: s1 [file s1]

Fig S1 Cell Viability

| HEK293             |      |        |        |       |        |
|--------------------|------|--------|--------|-------|--------|
| PR-619 (nM)        |      |        |        |       |        |
|                    | DMSO | 100    | 250    | 500   | 1000   |
| Cell Viability (%) | 100  | 104,69 | 100,93 | 99,43 | 100,53 |
|                    | 100  | 100,11 | 99,60  | 99,22 | 95,50  |
|                    | 100  | 98,88  | 95,56  | 93,97 | 96,38  |
|                    | 100  | 93,10  | 91,53  | 99,87 | 97,51  |
|                    | 100  | 101,49 | 98,12  | 94,22 | 97,16  |
|                    | 100  | 98,81  | 90,42  | 97,94 | 97,48  |

  

| WP1130 (nM)        |      |        |        |        |        |
|--------------------|------|--------|--------|--------|--------|
|                    | DMSO | 100    | 250    | 500    | 1000   |
| Cell Viability (%) | 100  | 104,60 | 104,61 | 103,31 | 104,23 |
|                    | 100  | 106,09 | 100,21 | 104,48 | 104,26 |
|                    | 100  | 97,00  | 97,20  | 96,64  | 93,65  |
|                    | 100  | 100,81 | 97,27  | 98,46  | 99,11  |
|                    | 100  | 99,43  | 99,50  | 99,19  | 96,68  |
|                    | 100  | 98,46  | 96,69  | 95,95  | 95,62  |

  

| Huh-7              |      |       |       |       |       |
|--------------------|------|-------|-------|-------|-------|
| PR-619 (nM)        |      |       |       |       |       |
|                    | DMSO | 100   | 250   | 500   | 1000  |
| Cell Viability (%) | 100  | 92,68 | 96,80 | 98,44 | 98,99 |
|                    | 100  | 94,26 | 95,34 | 99,99 | 94,47 |
|                    | 100  | 92,06 | 91,84 | 99,49 | 98,80 |
|                    | 100  | 94,47 | 98,49 | 94,78 | 94,38 |
|                    | 100  | 96,08 | 95,81 | 96,28 | 98,79 |
|                    | 100  | 93,83 | 94,37 | 99,36 | 90,07 |

  

| WP1130 (nM)        |      |       |       |       |       |
|--------------------|------|-------|-------|-------|-------|
|                    | DMSO | 100   | 250   | 500   | 1000  |
| Cell Viability (%) | 100  | 97,86 | 97,37 | 82,58 | 76,00 |
|                    | 100  | 91,24 | 95,82 | 82,32 | 74,04 |
|                    | 100  | 97,05 | 91,02 | 83,22 | 77,94 |
|                    | 100  | 95,82 | 92,58 | 82,96 | 77,61 |
|                    | 100  | 89,33 | 93,83 | 84,13 | 75,61 |
|                    | 100  | 95,03 | 92,01 | 83,86 | 79,59 |

  

| Vero               |      |        |       |       |       |
|--------------------|------|--------|-------|-------|-------|
| PR-619 (μM)        |      |        |       |       |       |
|                    | DMSO | 0,5    | 1     | 5     | 10    |
| Cell Viability (%) | 100  | 92,70  | 96,28 | 93,30 | 95,82 |
|                    | 100  | 101,06 | 95,48 | 97,84 | 90,94 |
|                    | 100  | 95,69  | 96,15 | 96,97 | 93,33 |
|                    | 100  | 104,04 | 98,93 | 91,10 | 91,93 |
|                    | 100  | 92,89  | 91,36 | 91,56 | 93,45 |
|                    | 100  | 94,00  | 90,33 | 96,52 | 91,02 |

  

| WP1130 (nM)        |      |         |        |        |        |
|--------------------|------|---------|--------|--------|--------|
|                    | DMSO | 50      | 100    | 250    | 500    |
| Cell Viability (%) | 100  | 92,317  | 90,968 | 95,329 | 76,123 |
|                    | 100  | 95,325  | 96,329 | 92,357 | 75,967 |
|                    | 100  | 98,666  | 97,857 | 93,895 | 71,082 |
|                    | 100  | 101,858 | 97,935 | 93,712 | 76,279 |
|                    | 100  | 95,639  | 93,237 | 96,499 | 73,211 |
|                    | 100  | 95,066  | 97,589 | 92,289 | 76,056 |

Fig S2 Plaque Assay

| HEK293 |          |            |           |
|--------|----------|------------|-----------|
|        | DMSO     | WP1130 1µM | PR619 1µM |
| PFU/mL | 3,5,E+04 | 3,0,E+03   | 2,5,E+04  |
|        | 4,5,E+04 | 1,0,E+03   | 1,8,E+04  |
|        | 4,0,E+04 | 2,0,E+03   | 1,5,E+04  |
|        | 3,5,E+04 | 2,5,E+03   | 1,0,E+04  |
|        | 3,0,E+04 | 3,5,E+03   | 1,0,E+04  |
|        | 3,3,E+04 | 3,3,E+03   | 1,5,E+04  |

| Vero   |          |              |           |
|--------|----------|--------------|-----------|
|        | DMSO     | WP1130 250nM | PR619 5µM |
| PFU/mL | 1,3,E+05 | 5,0,E+03     | 5,0,E+01  |
|        | 9,0,E+04 | 3,5,E+03     | 1,5,E+02  |
|        | 1,1,E+05 | 2,5,E+03     | 1,0,E+02  |
|        | 1,1,E+05 | 4,5,E+03     | 5,0,E+02  |
|        | 1,2,E+05 | 2,5,E+03     | 5,0,E+02  |
|        | 1,3,E+05 | 3,5,E+03     | 1,0,E+02  |

| Huh-7  |          |              |           |
|--------|----------|--------------|-----------|
|        | DMSO     | WP1130 250nM | PR619 1µM |
| PFU/mL | 1,2,E+06 | 1,5,E+05     | 1,1,E+06  |
|        | 1,2,E+06 | 2,5,E+05     | 1,1,E+06  |
|        | 1,2,E+06 | 2,0,E+05     | 1,1,E+06  |
|        | 7,5,E+05 | 2,5,E+05     | 1,0,E+06  |
|        | 9,0,E+05 | 4,0,E+05     | 8,0,E+05  |
|        | 8,3,E+05 | 3,3,E+05     | 9,0,E+05  |

Fig S2 Flow Cytometry

**HEK293**

|                           | DMSO | WP1130 1µM | PR619 1µM |
|---------------------------|------|------------|-----------|
| <b>Infected Cells (%)</b> | 20,6 | 3,6        | 24,6      |
|                           | 27,3 | 1,4        | 20,0      |
|                           | 24,5 | 4,3        | 14,9      |
|                           | 24,6 | 6,4        | 24,6      |
|                           | 27,3 | 7,0        | 20,0      |
|                           | 26,5 | 1,4        | 22,1      |

**Huh-7**

|                           | DMSO | WP1130 250nM | PR619 1µM |
|---------------------------|------|--------------|-----------|
| <b>Infected Cells (%)</b> | 88,0 | 20,1         | 76,8      |
|                           | 87,9 | 24,1         | 74,1      |
|                           | 80,7 | 24,0         | 83,6      |
|                           | 84,4 | 21,4         | 82,6      |
|                           | 74,7 | 19,4         | 84,0      |
|                           | 73,6 | 25,6         | 80,8      |

**Vero**

|                           | DMSO | WP1130 250nM | PR619 5µM |
|---------------------------|------|--------------|-----------|
| <b>Infected Cells (%)</b> | 91,5 | 18,1         | 38,7      |
|                           | 90,1 | 22,3         | 39,1      |
|                           | 91,1 | 32,2         | 35,5      |
|                           | 88,3 | 33,9         | 40,2      |
|                           | 96,8 | 20,3         | 41,4      |
|                           | 89,0 | 27,6         | 45,5      |

Fig S3 Flow Cytometry-Phase

| HEK293          |                           |                            |                                     |                           |                            |
|-----------------|---------------------------|----------------------------|-------------------------------------|---------------------------|----------------------------|
| Infection Rates |                           |                            | Infection (%) - Relative to Control |                           |                            |
| DMSO            | WP1130<br>(Pre-Treatment) | WP1130<br>(Post-Treatment) | DMSO                                | WP1130<br>(Pre-Treatment) | WP1130<br>(Post-Treatment) |
| 27,3            | 4,2                       | 12,6                       | 100                                 | 15,4                      | 46,2                       |
| 24,5            | 4,20                      | 6,42                       | 100                                 | 17,1                      | 26,2                       |
| 20,8            | 2,30                      | 9,11                       | 100                                 | 11,1                      | 43,8                       |
| 21,1            | 2,71                      | 6,41                       | 100                                 | 12,8                      | 30,4                       |
| Infection Rates |                           |                            | Infection (%) - Relative to Control |                           |                            |
| DMSO            | PR619<br>(Pre-Treatment)  | PR619<br>(Post-Treatment)  | DMSO                                | PR619<br>(Pre-Treatment)  | PR619<br>(Post-Treatment)  |
| 27,3            | 20,0                      | 22,1                       | 100                                 | 73,3                      | 81,0                       |
| 24,5            | 22,1                      | 23,4                       | 100                                 | 90,2                      | 95,5                       |
| 20,8            | 14,9                      | 19,6                       | 100                                 | 71,6                      | 94,2                       |
| 21,1            | 18,4                      | 20,1                       | 100                                 | 87,2                      | 95,3                       |
| Huh-7           |                           |                            |                                     |                           |                            |
| Infection Rates |                           |                            | Infection (%) - Relative to Control |                           |                            |
| DMSO            | WP1130<br>(Pre-Treatment) | WP1130<br>(Post-Treatment) | DMSO                                | WP1130<br>(Pre-Treatment) | WP1130<br>(Post-Treatment) |
| 88,0            | 20,1                      | 73,3                       | 100                                 | 22,8                      | 83,3                       |
| 87,9            | 24,1                      | 78,1                       | 100                                 | 27,4                      | 88,9                       |
| 74,7            | 24,3                      | 57,8                       | 100                                 | 32,5                      | 77,4                       |
| 73,6            | 21,4                      | 55                         | 100                                 | 29,1                      | 74,7                       |
| Infection Rates |                           |                            | Infection (%) - Relative to Control |                           |                            |
| DMSO            | PR619<br>(Pre-Treatment)  | PR619<br>(Post-Treatment)  | DMSO                                | PR619<br>(Pre-Treatment)  | PR619<br>(Post-Treatment)  |
| 88              | 76,8                      | 83,6                       | 100                                 | 87,3                      | 95,0                       |
| 87,9            | 74,1                      | 82,6                       | 100                                 | 84,3                      | 94,0                       |
| 74,7            | 63,3                      | 64,9                       | 100                                 | 84,7                      | 86,9                       |
| 73,6            | 61,7                      | 67,9                       | 100                                 | 83,8                      | 92,3                       |
| Vero            |                           |                            |                                     |                           |                            |
| Infection Rates |                           |                            | Infection (%) - Relative to Control |                           |                            |
| DMSO            | WP1130<br>(Pre-Treatment) | WP1130<br>(Post-Treatment) | DMSO                                | WP1130<br>(Pre-Treatment) | WP1130<br>(Post-Treatment) |
| 94,3            | 22,7                      | 90,2                       | 100                                 | 24,1                      | 95,7                       |
| 91,1            | 32,2                      | 80,4                       | 100                                 | 35,3                      | 88,3                       |
| 88,3            | 28,3                      | 61,6                       | 100                                 | 32,0                      | 69,8                       |
| 80,7            | 27,6                      | 77,1                       | 100                                 | 34,2                      | 95,5                       |
| Infection Rates |                           |                            | Infection (%) - Relative to Control |                           |                            |
| DMSO            | PR619<br>(Pre-Treatment)  | PR619<br>(Post-Treatment)  | DMSO                                | PR619<br>(Pre-Treatment)  | PR619<br>(Post-Treatment)  |
| 94,3            | 43,4                      | 93,4                       | 100                                 | 46,0                      | 99,0                       |
| 91,1            | 35,5                      | 76,9                       | 100                                 | 39,0                      | 84,4                       |
| 88,3            | 34,2                      | 78,2                       | 100                                 | 38,7                      | 88,6                       |
| 80,7            | 47,5                      | 69,8                       | 100                                 | 58,9                      | 86,5                       |

Fig S4 vRNA Fold Change

**Hek 293T**

| WP1130  |         |
|---------|---------|
| E1      | nsp4    |
| 0,10338 | 0,12878 |
| 0,09440 | 0,10688 |
| 0,28843 | 0,33143 |
| 0,27316 | 0,35677 |
| 0,14708 | 0,18091 |
| 0,14544 | 0,17890 |

**Hek 293T**

| PR619   |         |
|---------|---------|
| E       | NSP4    |
| 0,70097 | 0,94850 |
| 0,75412 | 0,81865 |
| 0,75537 | 0,98444 |
| 0,76871 | 1,17701 |
| 0,71605 | 1,00315 |
| 0,77027 | 0,80261 |

**Huh-7**

| WP1130  |         |
|---------|---------|
| E1      | nsp4    |
| 0,10282 | 0,22823 |
| 0,17871 | 0,23401 |
| 0,13279 | 0,29475 |
| 0,21154 | 0,31944 |
| 0,34828 | 0,24858 |
| 0,16877 | 0,24481 |

**Huh-7**

| PR619   |         |
|---------|---------|
| E1      | nsp4    |
| 0,80751 | 0,82778 |
| 0,83974 | 0,90320 |
| 0,95589 | 1,04336 |
| 0,97260 | 1,05335 |
| 0,84287 | 0,90279 |
| 0,9433  | 1,06622 |

**Vero**

| WP1130  |         |
|---------|---------|
| E1      | nsp4    |
| 0,04176 | 0,06778 |
| 0,0434  | 0,06081 |
| 0,0528  | 0,07572 |
| 0,0549  | 0,07175 |
| 0,0311  | 0,04081 |
| 0,0365  | 0,04794 |

**Vero**

| PR619  |         |
|--------|---------|
| E1     | nsp4    |
| 0,1748 | 0,22904 |
| 0,1734 | 0,23668 |
| 0,1475 | 0,19322 |
| 0,1260 | 0,16512 |
| 0,1307 | 0,17117 |
| 0,1284 | 0,16815 |
